# Supplementary material
Source: publisher site journal article supplement (https://www.dovepress.com/article/270543)
Supplement: Supplementary file 1 [file get_supplementary_file.php]

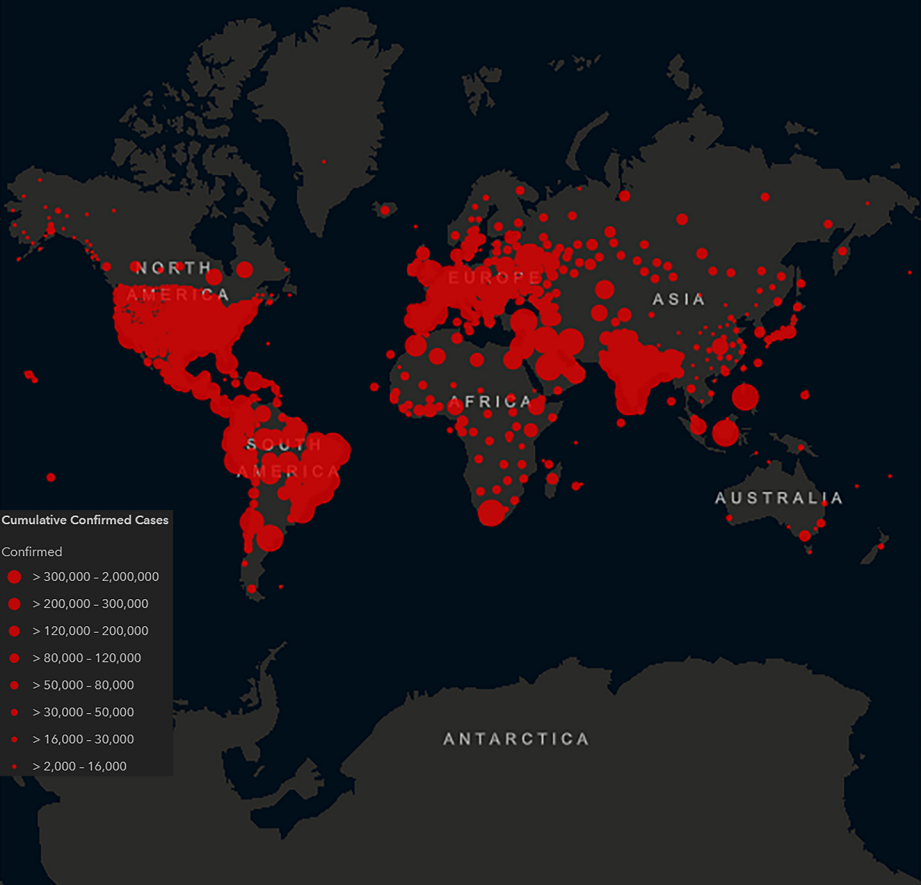

**Figure S1.** The visualization map of cumulative confirmed COVID-19 cases.

**Table S1. Clinical characteristics of patients infected with SARS-CoV-2**

|             | Patients at China |      | Patients outside of China |      | P-value          |
|-------------|-------------------|------|---------------------------|------|------------------|
|             | n=601             | %    | n=1310                    | %    |                  |
| Age (years) |                   |      |                           |      |                  |
| <20         | 20                | 3.3  | 46                        | 3.5  | 0.080            |
| 20-29       | 72                | 11.9 | 64                        | 4.9  | <b>0.002</b>     |
| 30-39       | 121               | 20.1 | 105                       | 8.0  | <b>&lt;0.001</b> |
| 40-49       | 122               | 20.2 | 125                       | 9.5  | <b>0.002</b>     |
| 50-59       | 95                | 15.8 | 170                       | 12.9 | 0.078            |
| 60-69       | 101               | 16.8 | 169                       | 12.9 | 0.228            |
| 70-79       | 33                | 5.5  | 102                       | 7.8  | <b>&lt;0.001</b> |
| ≥80         | 17                | 2.8  | 68                        | 5.2  | <b>&lt;0.001</b> |
| NM          | 16                | 2.7  | 456                       | 34.8 | -                |
| Sex         |                   |      |                           |      |                  |
| Male        | 311               | 51.7 | 506                       | 38.6 | 0.050            |
| Female      | 280               | 46.6 | 361                       | 27.6 | <b>0.030</b>     |
| NM          | 10                | 1.7  | 443                       | 33.8 | -                |
| Symptoms    |                   |      |                           |      |                  |
| Fever       | 434               | 72.2 | 568                       | 43.3 | <b>&lt;0.001</b> |
| Cough       | 210               | 34.9 | 356                       | 27.1 | <b>0.001</b>     |
| Fatigue     | 49                | 8.2  | 23                        | 1.8  | <b>&lt;0.001</b> |
| Muscle pain | 12                | 2.0  | 12                        | 0.9  | <b>0.049</b>     |
| Sore throat | 28                | 4.7  | 86                        | 6.6  | 0.102            |
| Headache    | 15                | 2.5  | 55                        | 4.2  | 0.066            |
| Runny nose  | 14                | 2.3  | 32                        | 2.4  | 0.881            |

Notes: P<0.05 was considered statistically significant and bolded.

**Table S2. The immunohistochemistry results of ACE2 in multiple organs.**

| ACE2                                                                              |                                                                                                                                                                                                                                                                                                                                                                                                                                                                                              |                                                                                     |                                                                                                                                                                                                                                                                                                                                                                                                                                                                                           |                                                                                     |                                                                                                                                                                                                                                                                                                                                                                                                                                                                                            |
|-----------------------------------------------------------------------------------|----------------------------------------------------------------------------------------------------------------------------------------------------------------------------------------------------------------------------------------------------------------------------------------------------------------------------------------------------------------------------------------------------------------------------------------------------------------------------------------------|-------------------------------------------------------------------------------------|-------------------------------------------------------------------------------------------------------------------------------------------------------------------------------------------------------------------------------------------------------------------------------------------------------------------------------------------------------------------------------------------------------------------------------------------------------------------------------------------|-------------------------------------------------------------------------------------|--------------------------------------------------------------------------------------------------------------------------------------------------------------------------------------------------------------------------------------------------------------------------------------------------------------------------------------------------------------------------------------------------------------------------------------------------------------------------------------------|
| Colon                                                                             |                                                                                                                                                                                                                                                                                                                                                                                                                                                                                              |                                                                                     |                                                                                                                                                                                                                                                                                                                                                                                                                                                                                           |                                                                                     |                                                                                                                                                                                                                                                                                                                                                                                                                                                                                            |
| 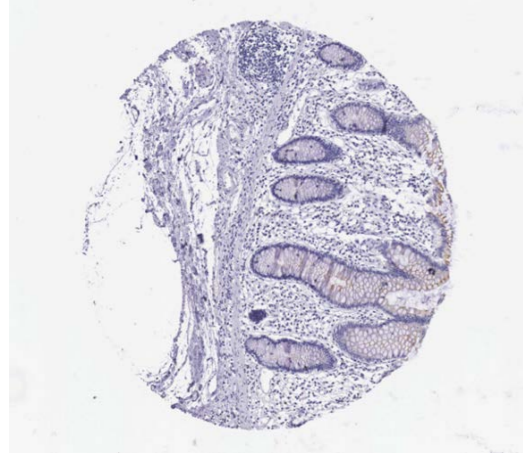 | <p>Female, age 55<br/>Colon (T-67000)<br/>Normal tissue, NOS (M-00100)<br/>Patient id: 634</p> <p><b>Endothelial cells</b><br/>Staining: Not detected<br/>Intensity: Negative<br/>Quantity: None<br/>Location: None</p> <p><b>Glandular cells</b><br/>Staining: Medium<br/>Intensity: Strong<br/>Quantity: &lt;25%<br/>Location: Cytoplasmic/membranous</p> <p><b>Peripheral nerve/ganglion</b><br/>Staining: Not detected<br/>Intensity: Negative<br/>Quantity: None<br/>Location: None</p> |  | <p>Male, age 1<br/>Colon (T-67000)<br/>Normal tissue, NOS (M-00100)<br/>Patient id: 177</p> <p><b>Endothelial cells</b><br/>Staining: Not detected<br/>Intensity: Negative<br/>Quantity: None<br/>Location: None</p> <p><b>Glandular cells</b><br/>Staining: Medium<br/>Intensity: Strong<br/>Quantity: &lt;25%<br/>Location: Cytoplasmic/membranous</p> <p><b>Peripheral nerve/ganglion</b><br/>Staining: Not detected<br/>Intensity: Negative<br/>Quantity: None<br/>Location: None</p> |  | <p>Male, age 54<br/>Colon (T-67000)<br/>Normal tissue, NOS (M-00100)<br/>Patient id: 966</p> <p><b>Endothelial cells</b><br/>Staining: Not detected<br/>Intensity: Negative<br/>Quantity: None<br/>Location: None</p> <p><b>Glandular cells</b><br/>Staining: Medium<br/>Intensity: Strong<br/>Quantity: &lt;25%<br/>Location: Cytoplasmic/membranous</p> <p><b>Peripheral nerve/ganglion</b><br/>Staining: Not detected<br/>Intensity: Negative<br/>Quantity: None<br/>Location: None</p> |

|                                                                                    |                                                                                                                                                                                                                                                                                                                                                                                                 |                                                                                      |                                                                                                                                                                                                                                                                                                                                       |                                                                                      |                                                                                                                                                                                                                                                                                                                                                                                                                                    |
|------------------------------------------------------------------------------------|-------------------------------------------------------------------------------------------------------------------------------------------------------------------------------------------------------------------------------------------------------------------------------------------------------------------------------------------------------------------------------------------------|--------------------------------------------------------------------------------------|---------------------------------------------------------------------------------------------------------------------------------------------------------------------------------------------------------------------------------------------------------------------------------------------------------------------------------------|--------------------------------------------------------------------------------------|------------------------------------------------------------------------------------------------------------------------------------------------------------------------------------------------------------------------------------------------------------------------------------------------------------------------------------------------------------------------------------------------------------------------------------|
|                                                                                    |                                                                                                                                                                                                                                                                                                                                                                                                 |                                                                                      |                                                                                                                                                                                                                                                                                                                                       |                                                                                      |                                                                                                                                                                                                                                                                                                                                                                                                                                    |
| 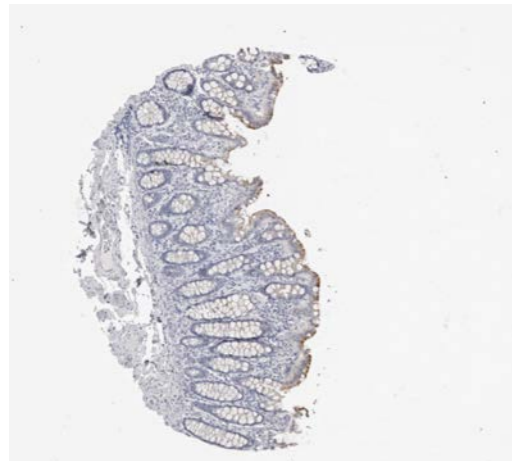 | <p>Female, age 61<br/>Peripheral nerve tissue (T-X0500)<br/>Colon (T-67000)<br/>Normal tissue, NOS (M-00100)<br/>Patient id: 1832</p> <p><b>Endothelial cells</b><br/>Staining: Not detected<br/>Quantity: None</p> <p><b>Glandular cells</b><br/>Intensity: Strong<br/>Location: Cytoplasmic/membranous</p> <p><b>Peripheral nerve/ganglion</b><br/>Intensity: Negative<br/>Location: None</p> |  | <p>Male, age 14<br/>Colon (T-67000)<br/>Normal tissue, NOS (M-00100)<br/>Patient id: 1990</p> <p><b>Endothelial cells</b><br/>Staining: Not detected<br/>Intensity: Negative<br/>Location: None</p> <p>Staining: High<br/>Quantity: 75%-25%</p> <p><b>Peripheral nerve/ganglion</b><br/>Staining: Not detected<br/>Quantity: None</p> |  | <p>Male, age 73<br/>Smooth muscle (T-1X300)<br/>Colon (T-67000)<br/>Normal tissue, NOS (M-00100)<br/>Patient id: 3266</p> <p><b>Endothelial cells</b><br/>Staining: Not detected<br/>Intensity: Negative<br/>Quantity: None</p> <p>Location: None</p> <p><b>Glandular cells</b><br/>Staining: High<br/>Intensity: Strong<br/>Quantity: 75%-25%</p> <p>Location: Cytoplasmic/membranous</p> <p><b>Peripheral nerve/ganglion</b></p> |

|                                                                                    |                                                                                                                                                         |                                                                                      |                                                                                                                                                                                 |                                                                                      |                                                                                                                                                                                                                                            |
|------------------------------------------------------------------------------------|---------------------------------------------------------------------------------------------------------------------------------------------------------|--------------------------------------------------------------------------------------|---------------------------------------------------------------------------------------------------------------------------------------------------------------------------------|--------------------------------------------------------------------------------------|--------------------------------------------------------------------------------------------------------------------------------------------------------------------------------------------------------------------------------------------|
|                                                                                    |                                                                                                                                                         |                                                                                      |                                                                                                                                                                                 |                                                                                      | <p>Staining: Not detected<br/> Intensity: Negative<br/> Quantity: None<br/> Location: None</p>                                                                                                                                             |
| <b>Duodenum</b>                                                                    |                                                                                                                                                         |                                                                                      |                                                                                                                                                                                 |                                                                                      |                                                                                                                                                                                                                                            |
| 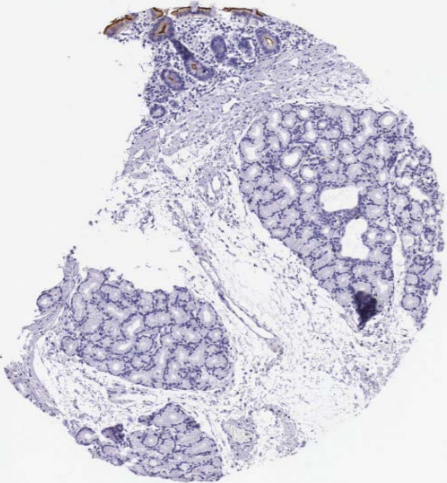 | <p>Female, age 48<br/> Duodenum (T-64300)<br/> Normal tissue, NOS (M-00100)<br/> Patient id: 75</p> <p><b>Glandular cells</b><br/> Staining: Medium</p> |  | <p>Female, age 77<br/> Duodenum (T-64300)<br/> Normal tissue, NOS (M-00100)<br/> Patient id: 195</p> <p><b>Glandular cells</b><br/> Staining: Medium<br/> Quantity: &lt;25%</p> |  | <p>Male, age 70<br/> Duodenum (T-64300)<br/> Normal tissue, NOS (M-00100)<br/> Patient id: 582</p> <p><b>Glandular cells</b><br/> Staining: Medium<br/> Intensity: Strong<br/> Quantity: &lt;25%<br/> Location: Cytoplasmic/membranous</p> |

|                                                                                    |                                                                                                                                                                                                                                        |                                                                                      |                                                                                                                                                                                                                                                    |                                                                                      |                                                                                                                                                                                                                                     |
|------------------------------------------------------------------------------------|----------------------------------------------------------------------------------------------------------------------------------------------------------------------------------------------------------------------------------------|--------------------------------------------------------------------------------------|----------------------------------------------------------------------------------------------------------------------------------------------------------------------------------------------------------------------------------------------------|--------------------------------------------------------------------------------------|-------------------------------------------------------------------------------------------------------------------------------------------------------------------------------------------------------------------------------------|
| 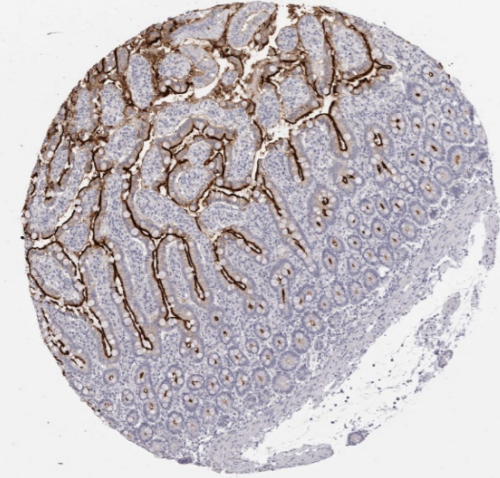  | <p>Female, age 71<br/>Small intestine, NOS (T-64000)<br/>Normal tissue, NOS (M-00100)<br/>Patient id: 3004</p> <p><b>Glandular cells</b><br/>Intensity: Strong</p>                                                                     |   | <p>Male, age 50<br/>Duodenum (T-64300)<br/>Pancreas (T-59000)<br/>Adenocarcinoma, NOS (M-81403)<br/>Normal tissue, NOS (M-00100)<br/>Patient id: 1904</p> <p><b>Glandular cells</b><br/>Intensity: Strong<br/>Location: Cytoplasmic/membranous</p> |   | <p>Male, age 54<br/>Duodenum (T-64300)<br/>Normal tissue, NOS (M-00100)<br/>Patient id: 2562</p> <p><b>Glandular cells</b><br/>Staining: High<br/>Intensity: Strong<br/>Quantity: &gt;75%<br/>Location: Cytoplasmic/membranous</p>  |
| <b>Gallbladder</b>                                                                 |                                                                                                                                                                                                                                        |                                                                                      |                                                                                                                                                                                                                                                    |                                                                                      |                                                                                                                                                                                                                                     |
|  | <p>Female, age 44<br/>Gallbladder (T-57000)<br/>Normal tissue, NOS (M-00100)<br/>Patient id: 112</p> <p><b>Glandular cells</b><br/>Staining: High<br/>Intensity: Strong<br/>Quantity: 75%-25%<br/>Location: Cytoplasmic/membranous</p> |  | <p>Female, age 76<br/>Gallbladder (T-57000)<br/>Normal tissue, NOS (M-00100)<br/>Patient id: 329</p> <p><b>Glandular cells</b><br/>Staining: High<br/>Intensity: Strong<br/>Quantity: 75%-25%<br/>Location: Cytoplasmic/membranous</p>             |  | <p>Male, age 73<br/>Gallbladder (T-57000)<br/>Normal tissue, NOS (M-00100)<br/>Patient id: 64</p> <p><b>Glandular cells</b><br/>Staining: High<br/>Intensity: Strong<br/>Quantity: 75%-25%<br/>Location: Cytoplasmic/membranous</p> |

|                                                                                   |                                                                                                                                                                                                                                         |                                                                                     |                                                                                                                                                                                                                                         |                                                                                     |                                                                                                                                                                                                                                       |
|-----------------------------------------------------------------------------------|-----------------------------------------------------------------------------------------------------------------------------------------------------------------------------------------------------------------------------------------|-------------------------------------------------------------------------------------|-----------------------------------------------------------------------------------------------------------------------------------------------------------------------------------------------------------------------------------------|-------------------------------------------------------------------------------------|---------------------------------------------------------------------------------------------------------------------------------------------------------------------------------------------------------------------------------------|
| 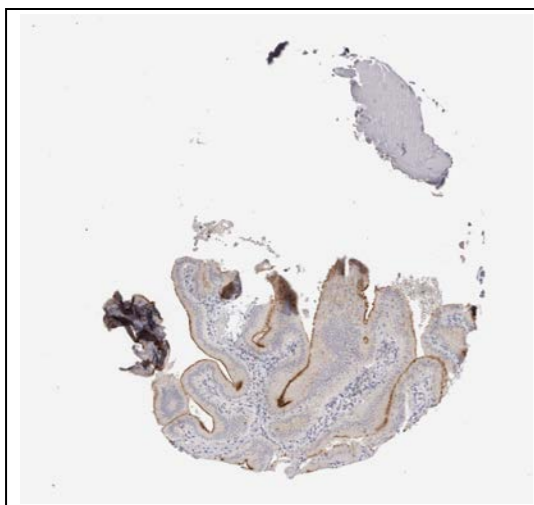 | <p>Female, age 30<br/>Gallbladder (T-57000)<br/>Normal tissue, NOS (M-00100)<br/>Patient id: 3307</p> <p><b>Glandular cells</b><br/>Staining: High<br/>Intensity: Strong<br/>Quantity: &gt;75%<br/>Location: Cytoplasmic/membranous</p> |  | <p>Female, age 64<br/>Gallbladder (T-57000)<br/>Normal tissue, NOS (M-00100)<br/>Patient id: 2025</p> <p><b>Glandular cells</b><br/>Staining: High<br/>Intensity: Strong<br/>Quantity: &gt;75%<br/>Location: Cytoplasmic/membranous</p> |  | <p>Male, age 38<br/>Gallbladder (T-57000)<br/>Normal tissue, NOS (M-00100)<br/>Patient id: 1999</p> <p><b>Glandular cells</b><br/>Staining: High<br/>Intensity: Strong<br/>Quantity: &gt;75%<br/>Location: Cytoplasmic/membranous</p> |
| Heart                                                                             |                                                                                                                                                                                                                                         |                                                                                     |                                                                                                                                                                                                                                         |                                                                                     |                                                                                                                                                                                                                                       |

|                                                                                    |                                                                                                                                                                                                                                |                                                                                      |                                                                                                                                                                                                                                |                                                                                     |                                                                                                                                                                                                                 |
|------------------------------------------------------------------------------------|--------------------------------------------------------------------------------------------------------------------------------------------------------------------------------------------------------------------------------|--------------------------------------------------------------------------------------|--------------------------------------------------------------------------------------------------------------------------------------------------------------------------------------------------------------------------------|-------------------------------------------------------------------------------------|-----------------------------------------------------------------------------------------------------------------------------------------------------------------------------------------------------------------|
| 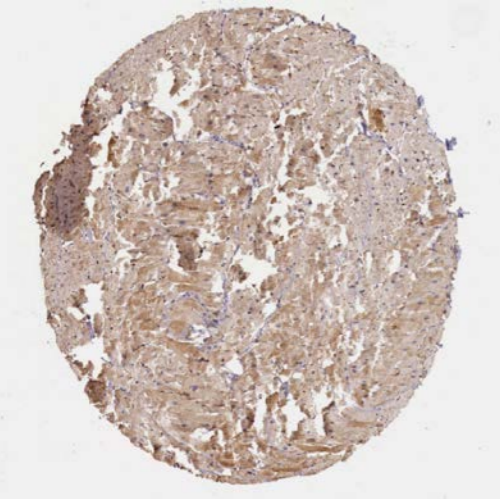  | <p>Female, age 19<br/>Heart (T-32000)<br/>Normal tissue, NOS (M-00100)<br/>Patient id: 2524</p> <p><b>Myocytes</b><br/>Staining: Medium<br/>Intensity: Moderate<br/>Quantity: &gt;75%<br/>Location: Cytoplasmic/membranous</p> |   | <p>Female, age 54<br/>Heart (T-32000)<br/>Normal tissue, NOS (M-00100)<br/>Patient id: 2523</p> <p><b>Myocytes</b><br/>Staining: Medium<br/>Intensity: Moderate<br/>Quantity: &gt;75%<br/>Location: Cytoplasmic/membranous</p> |  | <p>Female, age 54<br/>Heart (T-32000)<br/>Normal tissue, NOS (M-00100)<br/>Patient id: 2523</p> <p><b>Myocytes</b><br/>Staining: Not detected<br/>Intensity: Negative<br/>Quantity: None<br/>Location: None</p> |
|  | <p>Male, age 49<br/>Heart (T-32000)<br/>Normal tissue, NOS (M-00100)<br/>Patient id: 2278</p> <p><b>Myocytes</b><br/>Staining: Not detected<br/>Intensity: Negative<br/>Quantity: None<br/>Location: None</p>                  |  | <p>Male, age 54<br/>Heart (T-32000)<br/>Normal tissue, NOS (M-00100)<br/>Patient id: 3643</p> <p><b>Myocytes</b><br/>Staining: Not detected<br/>Intensity: Negative<br/>Quantity: None<br/>Location: None</p>                  |                                                                                     |                                                                                                                                                                                                                 |
| Rectum                                                                             |                                                                                                                                                                                                                                |                                                                                      |                                                                                                                                                                                                                                |                                                                                     |                                                                                                                                                                                                                 |



|                                                                                    |                                                                                                                                                                                                                                     |                                                                                      |                                                                                                                                                                                                                                   |                                                                                      |                                                                                                                                                                                                                                   |
|------------------------------------------------------------------------------------|-------------------------------------------------------------------------------------------------------------------------------------------------------------------------------------------------------------------------------------|--------------------------------------------------------------------------------------|-----------------------------------------------------------------------------------------------------------------------------------------------------------------------------------------------------------------------------------|--------------------------------------------------------------------------------------|-----------------------------------------------------------------------------------------------------------------------------------------------------------------------------------------------------------------------------------|
| 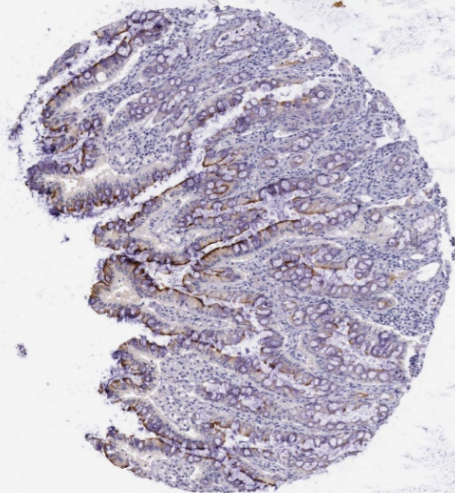  | <p>Female, age 60<br/>Rectum (T-68000)<br/>Normal tissue, NOS (M-00100)<br/>Patient id: 1087</p> <p><b>Glandular cells</b><br/>Staining: High<br/>Intensity: Strong<br/>Quantity: 75%-25%<br/>Location: Cytoplasmic/membranous</p>  |   | <p>Male, age 65<br/>Rectum (T-68000)<br/>Normal tissue, NOS (M-00100)<br/>Patient id: 62</p> <p><b>Glandular cells</b><br/>Staining: High<br/>Intensity: Strong<br/>Quantity: 75%-25%<br/>Location: Cytoplasmic/membranous</p>    |   | <p>Male, age 77<br/>Rectum (T-68000)<br/>Normal tissue, NOS (M-00100)<br/>Patient id: 222</p> <p><b>Glandular cells</b><br/>Staining: High<br/>Intensity: Strong<br/>Quantity: 75%-25%<br/>Location: Cytoplasmic/membranous</p>   |
|  | <p>Female, age 65<br/>Rectum (T-68000)<br/>Normal tissue, NOS (M-00100)<br/>Patient id: 3243</p> <p><b>Glandular cells</b><br/>Staining: Low<br/>Intensity: Moderate<br/>Quantity: &lt;25%<br/>Location: Cytoplasmic/membranous</p> |  | <p>Male, age 51<br/>Rectum (T-68000)<br/>Normal tissue, NOS (M-00100)<br/>Patient id: 3298</p> <p><b>Glandular cells</b><br/>Staining: Low<br/>Intensity: Moderate<br/>Quantity: &lt;25%<br/>Location: Cytoplasmic/membranous</p> |  | <p>Male, age 64<br/>Rectum (T-68000)<br/>Normal tissue, NOS (M-00100)<br/>Patient id: 2953</p> <p><b>Glandular cells</b><br/>Staining: Low<br/>Intensity: Moderate<br/>Quantity: &lt;25%<br/>Location: Cytoplasmic/membranous</p> |

| Seminal vesicle                                                                    |                                                                                                                                                                                                                                                                   |                                                                                      |                                                                                                                                                                                                                                                                   |                                                                                     |                                                                                                                                                                                                                                            |
|------------------------------------------------------------------------------------|-------------------------------------------------------------------------------------------------------------------------------------------------------------------------------------------------------------------------------------------------------------------|--------------------------------------------------------------------------------------|-------------------------------------------------------------------------------------------------------------------------------------------------------------------------------------------------------------------------------------------------------------------|-------------------------------------------------------------------------------------|--------------------------------------------------------------------------------------------------------------------------------------------------------------------------------------------------------------------------------------------|
| 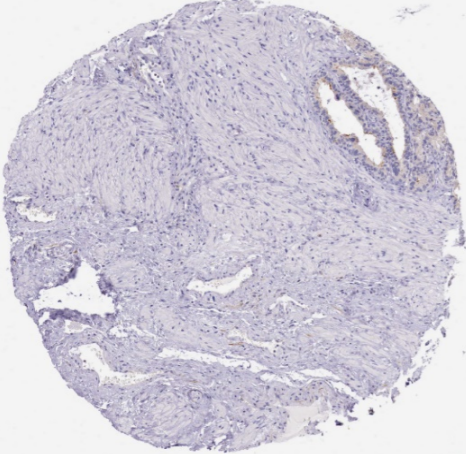  | <p>Male, age 63<br/>Seminal veicle (T-77500)<br/>Normal tissue, NOS (M-00100)<br/>Patient id: 472</p> <p><b>Glandular cells</b><br/>Staining: Low<br/>Intensity: Moderate<br/>Quantity: &lt;25%<br/>Location: Cytoplasmic/membranous</p>                          |   | <p>Male, age 69<br/>Seminal veicle (T-77500)<br/>Normal tissue, NOS (M-00100)<br/>Patient id: 525</p> <p><b>Glandular cells</b><br/>Staining: Low<br/>Intensity: Moderate<br/>Quantity: &lt;25%<br/>Location: Cytoplasmic/membranous</p>                          |  | <p>Male, age 46<br/>Seminal veicle (T-77500)<br/>Normal tissue, NOS (M-00100)<br/>Patient id: 3186</p> <p><b>Glandular cells</b><br/>Staining: Medium<br/>Intensity: Strong<br/>Quantity: &lt;25%<br/>Location: Cytoplasmic/membranous</p> |
|  | <p>Male, age 51<br/>Seminal veicle (T-77500)<br/>Prostate (T-77100)<br/>Normal tissue, NOS (M-00100)<br/>Patient id: 2053</p> <p><b>Glandular cells</b><br/>Staining: Medium<br/>Intensity: Strong<br/>Quantity: &lt;25%<br/>Location: Cytoplasmic/membranous</p> |  | <p>Male, age 51<br/>Seminal veicle (T-77500)<br/>Prostate (T-77100)<br/>Normal tissue, NOS (M-00100)<br/>Patient id: 1761</p> <p><b>Glandular cells</b><br/>Staining: Medium<br/>Intensity: Strong<br/>Quantity: &lt;25%<br/>Location: Cytoplasmic/membranous</p> |                                                                                     |                                                                                                                                                                                                                                            |

|                                                                                    |                                                                                                                                                                                                                                                  |                                                                                      |                                                                                                                                                                                                                                                  |                                                                                     |                                                                                                                                                                                                                                                                                 |
|------------------------------------------------------------------------------------|--------------------------------------------------------------------------------------------------------------------------------------------------------------------------------------------------------------------------------------------------|--------------------------------------------------------------------------------------|--------------------------------------------------------------------------------------------------------------------------------------------------------------------------------------------------------------------------------------------------|-------------------------------------------------------------------------------------|---------------------------------------------------------------------------------------------------------------------------------------------------------------------------------------------------------------------------------------------------------------------------------|
|                                                                                    |                                                                                                                                                                                                                                                  |                                                                                      |                                                                                                                                                                                                                                                  |                                                                                     |                                                                                                                                                                                                                                                                                 |
| Small intestine                                                                    |                                                                                                                                                                                                                                                  |                                                                                      |                                                                                                                                                                                                                                                  |                                                                                     |                                                                                                                                                                                                                                                                                 |
| 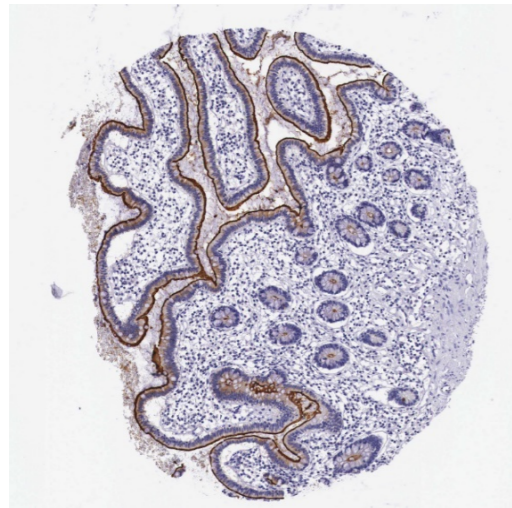  | <p>Female, age 37<br/> Small intestine (T-65000)<br/> Normal tissue, NOS (M-00100)<br/> Patient id: 29</p> <p><b>Glandular cells</b><br/> Staining: High<br/> Intensity: Strong<br/> Quantity: 75%-25%<br/> Location: Cytoplasmic/membranous</p> |   | <p>Male, age 1<br/> Small intestine (T-65000)<br/> Normal tissue, NOS (M-00100)<br/> Patient id: 493</p> <p><b>Glandular cells</b><br/> Staining: High<br/> Intensity: Strong<br/> Quantity: 75%-25%<br/> Location: Cytoplasmic/membranous</p>   |  | <p>Female, age 84<br/> Smooth muscle (T-1X300)<br/> Small intestine (T-65000)<br/> Normal tissue, NOS (M-00100)<br/> Patient id: 2256</p> <p><b>Glandular cells</b><br/> Staining: High<br/> Intensity: Strong<br/> Quantity: &gt;75%<br/> Location: Cytoplasmic/membranous</p> |
|  | <p>Male, age 7<br/> Small intestine (T-65000)<br/> Normal tissue, NOS (M-00100)<br/> Patient id: 1826</p> <p><b>Glandular cells</b><br/> Staining: High<br/> Intensity: Strong<br/> Quantity: &gt;75%<br/> Location: Cytoplasmic/membranous</p>  |  | <p>Male, age 41<br/> Small intestine (T-65000)<br/> Normal tissue, NOS (M-00100)<br/> Patient id: 2226</p> <p><b>Glandular cells</b><br/> Staining: High<br/> Intensity: Strong<br/> Quantity: &gt;75%<br/> Location: Cytoplasmic/membranous</p> |                                                                                     |                                                                                                                                                                                                                                                                                 |



**Table S3. The immunohistochemistry results of TMPRSS2 in multiple organs.**

| TMPRSS2                                                                           |                                                                                                                                                                                                                                                                                                                                                                  |                                                                                     |                                                                                                                                                                                                                                                                                                                                                                |  |  |
|-----------------------------------------------------------------------------------|------------------------------------------------------------------------------------------------------------------------------------------------------------------------------------------------------------------------------------------------------------------------------------------------------------------------------------------------------------------|-------------------------------------------------------------------------------------|----------------------------------------------------------------------------------------------------------------------------------------------------------------------------------------------------------------------------------------------------------------------------------------------------------------------------------------------------------------|--|--|
| Colon                                                                             |                                                                                                                                                                                                                                                                                                                                                                  |                                                                                     |                                                                                                                                                                                                                                                                                                                                                                |  |  |
| 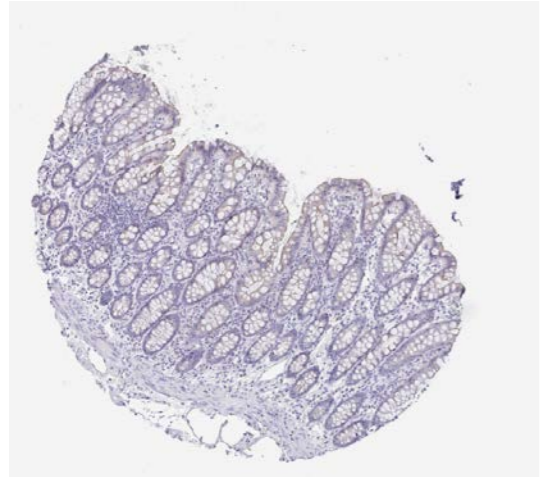 | <p>Female, age 84<br/>Colon (T-67000)<br/>Normal tissue, NOS (M-00100)<br/>Patient id: 1958</p> <p><b>Endothelial cells</b><br/>Staining: Not detected<br/>Intensity: Negative<br/>Quantity: None<br/>Location: None</p> <p><b>Glandular cells</b><br/>Staining: Not detected<br/>Intensity: Weak<br/>Quantity: &lt;25%<br/>Location: Cytoplasmic/membranous</p> |  | <p>Male, age 84<br/>Colon (T-67000)<br/>Normal tissue, NOS (M-00100)<br/>Patient id: 1960</p> <p><b>Endothelial cells</b><br/>Staining: Not detected<br/>Intensity: Negative<br/>Quantity: None<br/>Location: None</p> <p><b>Glandular cells</b><br/>Staining: Not detected<br/>Intensity: Weak<br/>Quantity: &lt;25%<br/>Location: Cytoplasmic/membranous</p> |  |  |

|                                                                                   |                                                                                                                                                                                                                                                                                                  |                                                                                     |                                                                                                                                                                                                                                                                                                  |                                                                                     |                                                                                                                                                                                                                                                                                                |
|-----------------------------------------------------------------------------------|--------------------------------------------------------------------------------------------------------------------------------------------------------------------------------------------------------------------------------------------------------------------------------------------------|-------------------------------------------------------------------------------------|--------------------------------------------------------------------------------------------------------------------------------------------------------------------------------------------------------------------------------------------------------------------------------------------------|-------------------------------------------------------------------------------------|------------------------------------------------------------------------------------------------------------------------------------------------------------------------------------------------------------------------------------------------------------------------------------------------|
|                                                                                   |                                                                                                                                                                                                                                                                                                  |                                                                                     |                                                                                                                                                                                                                                                                                                  |                                                                                     |                                                                                                                                                                                                                                                                                                |
| Duodenum                                                                          |                                                                                                                                                                                                                                                                                                  |                                                                                     |                                                                                                                                                                                                                                                                                                  |                                                                                     |                                                                                                                                                                                                                                                                                                |
| 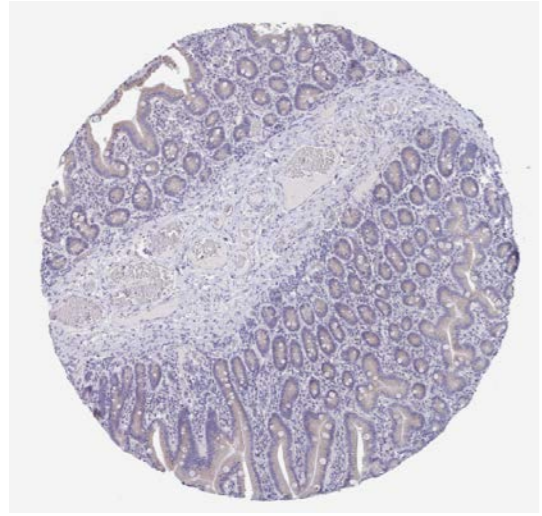 | <p>Female, age 62<br/>         Duodenum (T-64300)<br/>         Normal tissue, NOS (M-00100)<br/>         Patient id: 3515</p> <p><b>Glandular cells</b><br/>         Staining: Low<br/>         Intensity: Weak<br/>         Quantity: 75%-25%<br/>         Location: Cytoplasmic/membranous</p> |  | <p>Female, age 67<br/>         Duodenum (T-64300)<br/>         Normal tissue, NOS (M-00100)<br/>         Patient id: 3479</p> <p><b>Glandular cells</b><br/>         Staining: Low<br/>         Intensity: Weak<br/>         Quantity: 75%-25%<br/>         Location: Cytoplasmic/membranous</p> |  | <p>Male, age 59<br/>         Duodenum (T-64300)<br/>         Normal tissue, NOS (M-00100)<br/>         Patient id: 1961</p> <p><b>Glandular cells</b><br/>         Staining: Low<br/>         Intensity: Weak<br/>         Quantity: 75%-25%<br/>         Location: Cytoplasmic/membranous</p> |
| Stomach                                                                           |                                                                                                                                                                                                                                                                                                  |                                                                                     |                                                                                                                                                                                                                                                                                                  |                                                                                     |                                                                                                                                                                                                                                                                                                |

|                                                                                    |                                                                                                                                                                                                                                                |                                                                                      |                                                                                                                                                                                                                                                                |                                                                                      |                                                                                                                                                                                                                                                                 |
|------------------------------------------------------------------------------------|------------------------------------------------------------------------------------------------------------------------------------------------------------------------------------------------------------------------------------------------|--------------------------------------------------------------------------------------|----------------------------------------------------------------------------------------------------------------------------------------------------------------------------------------------------------------------------------------------------------------|--------------------------------------------------------------------------------------|-----------------------------------------------------------------------------------------------------------------------------------------------------------------------------------------------------------------------------------------------------------------|
| 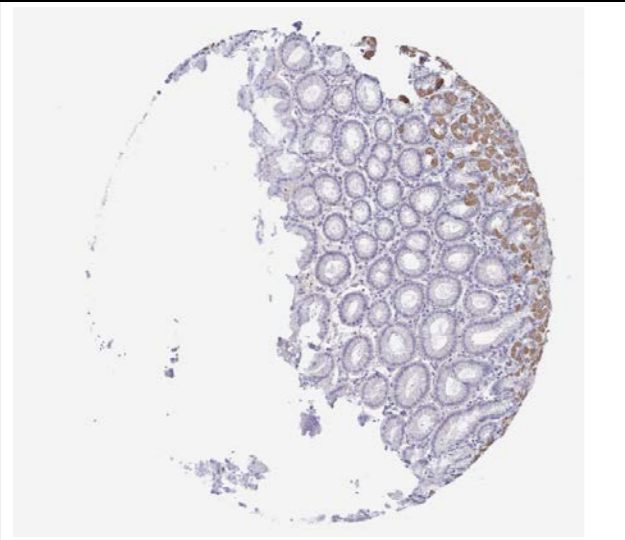  | <p>Female, age 56<br/>Stomach, upper (T-62350)<br/>Normal tissue, NOS (M-00100)<br/>Patient id: 2130</p> <p><b>Glandular cells</b><br/>Staining: Medium<br/>Intensity: Moderate<br/>Quantity: 75%-25%<br/>Location: Cytoplasmic/membranous</p> |   | <p>Female, age 57<br/>Stomach (T-63000)<br/>Normal tissue, NOS (M-00100)<br/>Patient id: 1467</p> <p><b>Glandular cells</b><br/>Staining: Medium<br/>Intensity: Moderate<br/>Quantity: 75%-25%<br/>Location: Cytoplasmic/membranous</p>                        |   | <p>Female, age 61<br/>Stomach (T-63000)<br/>Normal tissue, NOS (M-00100)<br/>Patient id: 1924</p> <p><b>Glandular cells</b><br/>Staining: Medium<br/>Intensity: Moderate<br/>Quantity: 75%-25%<br/>Location: Cytoplasmic/membranous</p>                         |
|  | <p>Male, age 55<br/>Stomach (T-63000)<br/>Normal tissue, NOS (M-00100)<br/>Patient id: 1650</p> <p><b>Glandular cells</b><br/>Staining: Low<br/>Intensity: Moderate<br/>Quantity: &lt;25%<br/>Location: Cytoplasmic/membranous</p>             |  | <p>Male, age 70<br/>Smooth muscle (T-1X300)<br/>Stomach (T-63000)<br/>Normal tissue, NOS (M-00100)<br/>Patient id: 4847</p> <p><b>Glandular cells</b><br/>Staining: Low<br/>Intensity: Moderate<br/>Quantity: &lt;25%<br/>Location: Cytoplasmic/membranous</p> |  | <p>Male, age 76<br/>Stomach, lower (T-63700)<br/>Stomach (T-63000)<br/>Normal tissue, NOS (M-00100)<br/>Patient id: 2066</p> <p><b>Glandular cells</b><br/>Staining: Low<br/>Intensity: Moderate<br/>Quantity: &lt;25%<br/>Location: Cytoplasmic/membranous</p> |
| Small intestine                                                                    |                                                                                                                                                                                                                                                |                                                                                      |                                                                                                                                                                                                                                                                |                                                                                      |                                                                                                                                                                                                                                                                 |

|                                                                                    |                                                                                                                                                                                                                                          |                                                                                      |                                                                                                                                                                                                                                        |                                                                                      |                                                                                                                                                                                                                                        |
|------------------------------------------------------------------------------------|------------------------------------------------------------------------------------------------------------------------------------------------------------------------------------------------------------------------------------------|--------------------------------------------------------------------------------------|----------------------------------------------------------------------------------------------------------------------------------------------------------------------------------------------------------------------------------------|--------------------------------------------------------------------------------------|----------------------------------------------------------------------------------------------------------------------------------------------------------------------------------------------------------------------------------------|
| 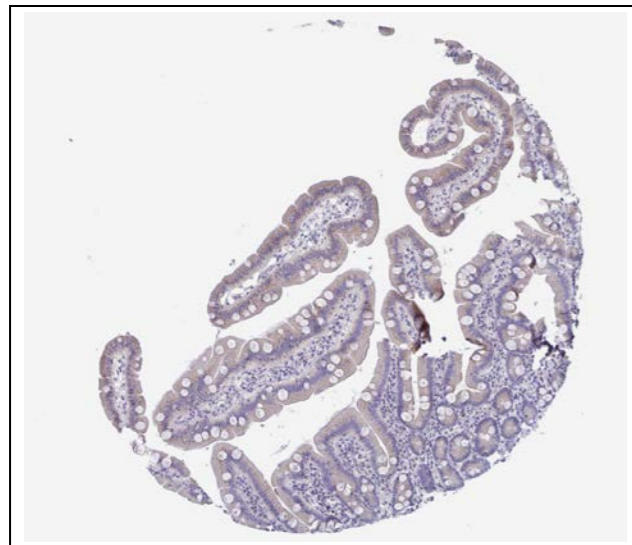  | <p>Female, age 68<br/>Small intestine (T-65000)<br/>Normal tissue, NOS (M-00100)<br/>Patient id: 3852</p> <p><b>Glandular cells</b><br/>Staining: Low<br/>Intensity: Weak<br/>Quantity: 75%-25%<br/>Location: Cytoplasmic/membranous</p> |   | <p>Male, age 26<br/>Small intestine (T-65000)<br/>Normal tissue, NOS (M-00100)<br/>Patient id: 3472</p> <p><b>Glandular cells</b><br/>Staining: Low<br/>Intensity: Weak<br/>Quantity: 75%-25%<br/>Location: Cytoplasmic/membranous</p> |   | <p>Male, age 70<br/>Small intestine (T-65000)<br/>Normal tissue, NOS (M-00100)<br/>Patient id: 1919</p> <p><b>Glandular cells</b><br/>Staining: Low<br/>Intensity: Weak<br/>Quantity: 75%-25%<br/>Location: Cytoplasmic/membranous</p> |
| Rectum                                                                             |                                                                                                                                                                                                                                          |                                                                                      |                                                                                                                                                                                                                                        |                                                                                      |                                                                                                                                                                                                                                        |
|  | <p>Female, age 58<br/>Rectum (T-68000)<br/>Normal tissue, NOS (M-00100)<br/>Patient id: 4489</p> <p><b>Glandular cells</b><br/>Staining: Low<br/>Intensity: Moderate<br/>Quantity: &lt;25%<br/>Location: Cytoplasmic/membranous</p>      |  | <p>Male, age 53<br/>Rectum (T-68000)<br/>Normal tissue, NOS (M-00100)<br/>Patient id: 4406</p> <p><b>Glandular cells</b><br/>Staining: Low<br/>Intensity: Moderate<br/>Quantity: &lt;25%<br/>Location: Cytoplasmic/membranous</p>      |  | <p>Male, age 72<br/>Rectum (T-68000)<br/>Normal tissue, NOS (M-00100)<br/>Patient id: 3074</p> <p><b>Glandular cells</b><br/>Staining: Low<br/>Intensity: Moderate<br/>Quantity: &lt;25%<br/>Location: Cytoplasmic/membranous</p>      |
| Thyroid gland                                                                      |                                                                                                                                                                                                                                          |                                                                                      |                                                                                                                                                                                                                                        |                                                                                      |                                                                                                                                                                                                                                        |



|                                                                                    |                                                                                                                                                                                                                                                                              |                                                                                     |                                                                                                                                                                                                                                |                                                                                     |                                                                                                                                                                                                                              |
|------------------------------------------------------------------------------------|------------------------------------------------------------------------------------------------------------------------------------------------------------------------------------------------------------------------------------------------------------------------------|-------------------------------------------------------------------------------------|--------------------------------------------------------------------------------------------------------------------------------------------------------------------------------------------------------------------------------|-------------------------------------------------------------------------------------|------------------------------------------------------------------------------------------------------------------------------------------------------------------------------------------------------------------------------|
| 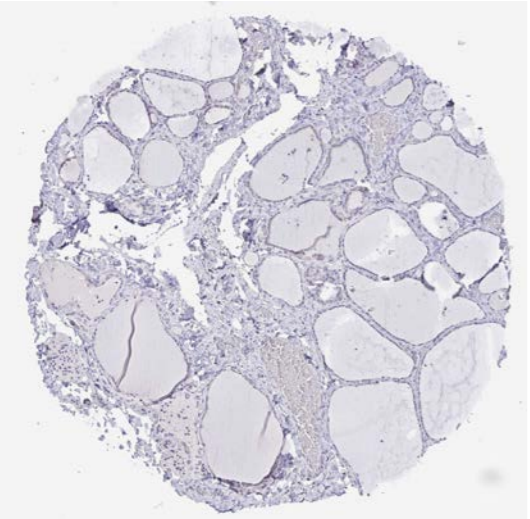  | <p>Female, age 36<br/>Thyroid gland (T-96000)<br/>Normal tissue, NOS (M-00100)<br/>Patient id: 1691</p> <p><b>Glandular cells</b><br/>Staining: Not detected<br/>Intensity: Negative<br/>Quantity: None<br/>Location: None</p>                                               |  | <p>Female, age 56<br/>Thyroid gland (T-96000)<br/>Normal tissue, NOS (M-00100)<br/>Patient id: 3239</p> <p><b>Glandular cells</b><br/>Staining: Not detected<br/>Intensity: Negative<br/>Quantity: None<br/>Location: None</p> |  | <p>Male, age 56<br/>Thyroid gland (T-96000)<br/>Normal tissue, NOS (M-00100)<br/>Patient id: 1672</p> <p><b>Glandular cells</b><br/>Staining: Not detected<br/>Intensity: Negative<br/>Quantity: None<br/>Location: None</p> |
| <p>Parathyroid gland</p>                                                           |                                                                                                                                                                                                                                                                              |                                                                                     |                                                                                                                                                                                                                                |                                                                                     |                                                                                                                                                                                                                              |
|  | <p>Female, age 86<br/>Parathyroid gland (T-97000)<br/>Adenoma, NOS (M-84000)<br/>Normal tissue, NOS (M-00100)<br/>Patient id: 3176</p> <p><b>Glandular cells</b><br/>Staining: Medium<br/>Intensity: Moderate<br/>Quantity: &gt;75%<br/>Location: Cytoplasmic/membranous</p> |                                                                                     |                                                                                                                                                                                                                                |                                                                                     |                                                                                                                                                                                                                              |
| <p>Lung</p>                                                                        |                                                                                                                                                                                                                                                                              |                                                                                     |                                                                                                                                                                                                                                |                                                                                     |                                                                                                                                                                                                                              |

|                                                                                    |                                                                                                                                                                                                                                                                                                                                                  |                                                                                      |                                                                                                                                                                                                                                                                                                                                                                                                          |                                                                                      |                                                                                                                                                                                                                                                                                                                                                |
|------------------------------------------------------------------------------------|--------------------------------------------------------------------------------------------------------------------------------------------------------------------------------------------------------------------------------------------------------------------------------------------------------------------------------------------------|--------------------------------------------------------------------------------------|----------------------------------------------------------------------------------------------------------------------------------------------------------------------------------------------------------------------------------------------------------------------------------------------------------------------------------------------------------------------------------------------------------|--------------------------------------------------------------------------------------|------------------------------------------------------------------------------------------------------------------------------------------------------------------------------------------------------------------------------------------------------------------------------------------------------------------------------------------------|
| 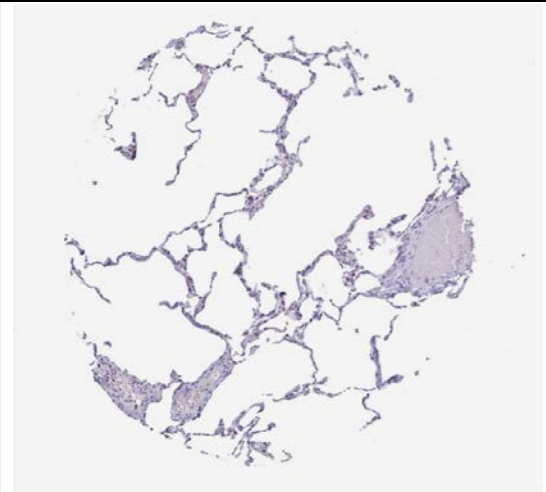  | <p>Female, age 57<br/>Lung (T-28000)<br/>Normal tissue, NOS (M-00100)<br/>Patient id: 1678</p> <p><b>Macrophages</b><br/>Staining: Low<br/>Intensity: Moderate<br/>Quantity: &lt;25%<br/>Location: Cytoplasmic/membranous</p> <p><b>Pneumocytes</b><br/>Staining: Not detected<br/>Intensity: Negative<br/>Quantity: None<br/>Location: None</p> |   | <p>Female, age 67 Lung (T-28000)<br/>Cartilage tissue (T-1X700)<br/>Adenocarcinoma, NOS (M-81403)<br/>Normal tissue, NOS (M-00100)<br/>Patient id: 2208</p> <p><b>Macrophages</b><br/>Staining: Low<br/>Intensity: Moderate<br/>Quantity: &lt;25%<br/>Location: Cytoplasmic/membranous</p> <p><b>Pneumocytes</b><br/>Staining: Not detected<br/>Intensity: Negative Quantity:None<br/>Location: None</p> |   | <p>Male, age 65<br/>Lung (T-28000)<br/>Normal tissue, NOS (M-00100)<br/>Patient id: 1470</p> <p><b>Macrophages</b><br/>Staining: Low<br/>Intensity: Moderate<br/>Quantity: &lt;25%<br/>Location: Cytoplasmic/membranous</p> <p><b>Pneumocytes</b><br/>Staining: Not detected<br/>Intensity: Negative<br/>Quantity: None<br/>Location: None</p> |
| Salivary gland                                                                     |                                                                                                                                                                                                                                                                                                                                                  |                                                                                      |                                                                                                                                                                                                                                                                                                                                                                                                          |                                                                                      |                                                                                                                                                                                                                                                                                                                                                |
|  | <p>Female, age 24<br/>Salivary gland (T-55100)<br/>Normal tissue, NOS (M-00100)<br/>Patient id: 2323</p> <p><b>Glandular cells</b><br/>Staining: Low<br/>Intensity: Moderate<br/>Quantity: &lt;25%<br/>Location: Cytoplasmic/membranous</p>                                                                                                      |  | <p>Female, age 43<br/>Salivary gland (T-55100)<br/>Normal tissue, NOS (M-00100)<br/>Patient id: 2164</p> <p><b>Glandular cells</b><br/>Staining: Low<br/>Intensity: Moderate<br/>Quantity: &lt;25%<br/>Location: Cytoplasmic/membranous</p>                                                                                                                                                              |  | <p>Male, age 38<br/>Salivary gland (T-55100)<br/>Peripheral nerve tissue (T-X0500)<br/>Normal tissue, NOS (M-00100)<br/>Patient id: 2161</p> <p><b>Glandular cells</b><br/>Staining: Low<br/>Intensity: Moderate<br/>Quantity: &lt;25%<br/>Location: Cytoplasmic/membranous</p>                                                                |

Liver

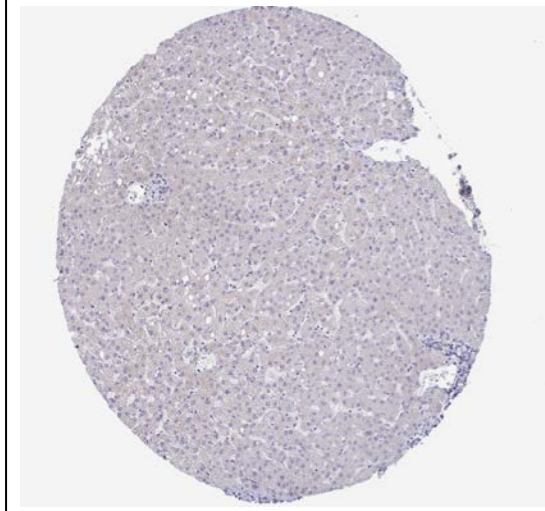

Female, age 54 Liver (T-56000)  
 Normal tissue, NOS (M-00100)  
 Patient id: 3402  
**Bile duct cells**  
 Staining: Not detected  
 Intensity: Negative  
 Quantity: None  
 Location: None  
**Hepatocytes**  
 Staining: Not detected  
 Intensity: Negative  
 Quantity: None  
 Location: None

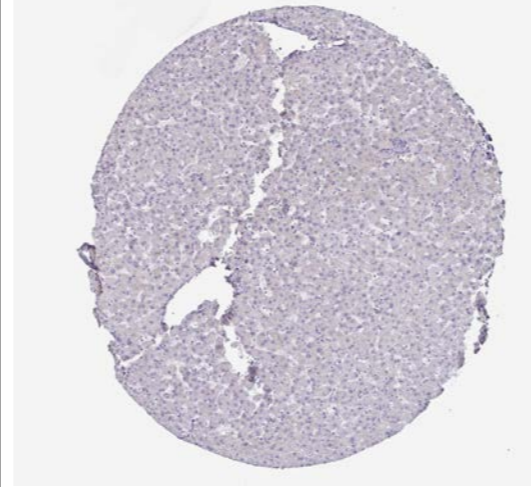

Female, age 63 Liver (T-56000)  
 Normal tissue, NOS (M-00100)  
 Patient id: 3222  
**Bile duct cells**  
 Staining: Not detected  
 Intensity: Negative  
 Quantity: None  
 Location: None  
**Hepatocytes**  
 Staining: Not detected  
 Intensity: Negative  
 Quantity: None  
 Location: None

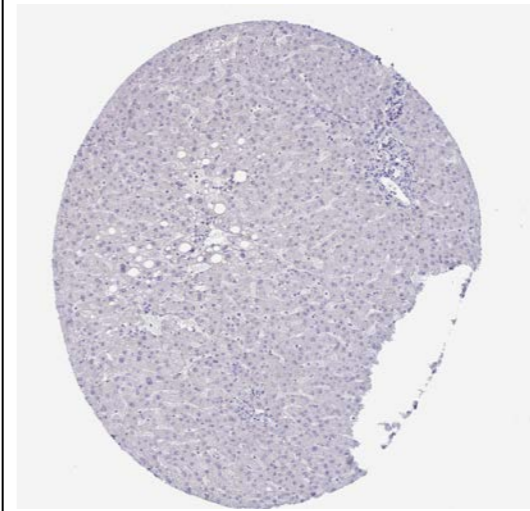

Male, age 67 Liver (T-56000)  
 Normal tissue, NOS (M-00100)  
 Patient id: 1720  
**Bile duct cells**  
 Staining: Not detected  
 Intensity: Negative  
 Quantity: None  
 Location: None  
**Hepatocytes**  
 Staining: Not detected  
 Intensity: Negative  
 Quantity: None  
 Location: None

Gallbladder

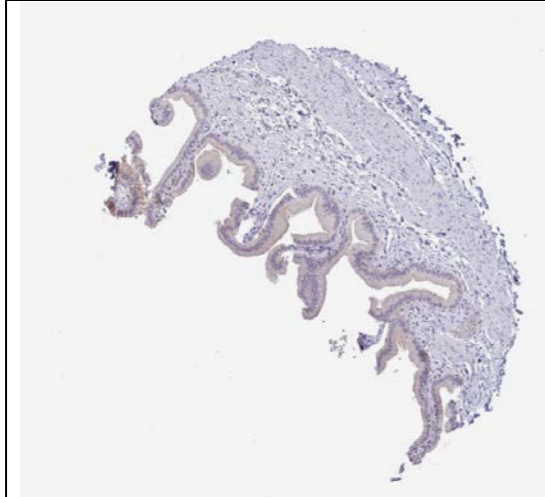

Female, age 63  
 Gallbladder (T-57000)  
 Normal tissue, NOS (M-00100)  
 Patient id: 2201  
**Glandular cells**  
 Staining: Not detected  
 Intensity: Weak  
 Quantity: <25%  
 Location: Cytoplasmic/membranous

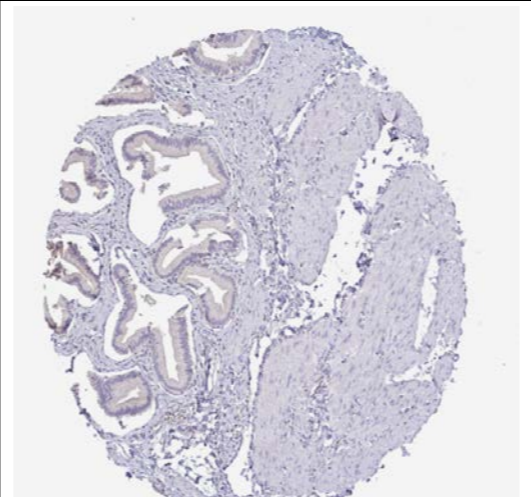

Male, age 17  
 Peripheral nerve tissue (T-X0500)  
 Gallbladder (T-57000)  
 Normal tissue, NOS (M-00100)  
 Patient id: 1602  
**Glandular cells**  
 Staining: Not detected  
 Intensity: Weak  
 Quantity: <25%  
 Location: Cytoplasmic/membranous

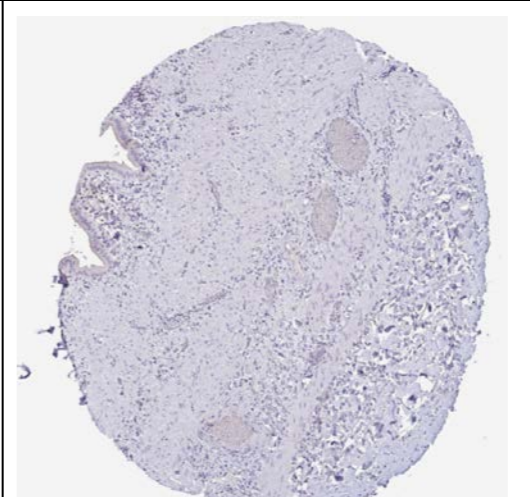

Male, age 26  
 Gallbladder (T-57000)  
 Normal tissue, NOS (M-00100)  
 Patient id: 3472  
**Glandular cells**  
 Staining: Not detected  
 Intensity: Weak  
 Quantity: <25%  
 Location: Cytoplasmic/membranous

| Pancreas                                                                           |                                                                                                                                                                                                                                                                                                                                                                         |                                                                                      |                                                                                                                                                                                                                                                                                                                                                                                                        |                                                                                      |                                                                                                                                                                                                                                                                                                                                                                      |
|------------------------------------------------------------------------------------|-------------------------------------------------------------------------------------------------------------------------------------------------------------------------------------------------------------------------------------------------------------------------------------------------------------------------------------------------------------------------|--------------------------------------------------------------------------------------|--------------------------------------------------------------------------------------------------------------------------------------------------------------------------------------------------------------------------------------------------------------------------------------------------------------------------------------------------------------------------------------------------------|--------------------------------------------------------------------------------------|----------------------------------------------------------------------------------------------------------------------------------------------------------------------------------------------------------------------------------------------------------------------------------------------------------------------------------------------------------------------|
| 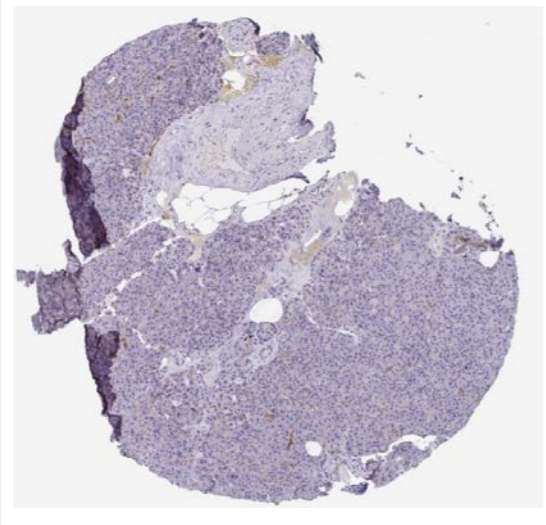  | <p>Female, age 74<br/>Pancreas (T-59000)<br/>Normal tissue, NOS (M-00100)<br/>Patient id: 2162</p> <p><b>Exocrine glandular cells</b><br/>Staining: Medium<br/>Intensity: Strong Quantity: &lt;25%<br/>Location: Cytoplasmic/membranous</p> <p><b>Islets of Langerhans</b><br/>Staining: Not detected<br/>Intensity: Negative<br/>Quantity: None<br/>Location: None</p> |   | <p>Male, age 54<br/>Peripheral nerve tissue (T-X0500)<br/>Pancreas (T-59000)<br/>Normal tissue, NOS (M-00100)<br/>Patient id: 2562</p> <p><b>Exocrine glandular cells</b><br/>Staining: Medium<br/>Intensity: Strong Quantity: &lt;25%<br/>Location: Cytoplasmic/membranous</p> <p><b>Islets of Langerhans</b><br/>Staining: Not detected<br/>Intensity: Negative Quantity:None<br/>Location: None</p> |   | <p>Male, age 57<br/>Pancreas (T-59000)<br/>Normal tissue, NOS (M-00100)<br/>Patient id: 4156</p> <p><b>Exocrine glandular cells</b><br/>Staining: Medium<br/>Intensity: Strong<br/>Quantity: &lt;25%<br/>Location: Cytoplasmic/membranous</p> <p><b>Islets of Langerhans</b><br/>Staining: Not detected<br/>Intensity: Negative Quantity:None<br/>Location: None</p> |
| Epididymis                                                                         |                                                                                                                                                                                                                                                                                                                                                                         |                                                                                      |                                                                                                                                                                                                                                                                                                                                                                                                        |                                                                                      |                                                                                                                                                                                                                                                                                                                                                                      |
|  | <p>Male, age 25<br/>Epididymis (T-79100)<br/>Normal tissue, NOS (M-00100)<br/>Patient id: 4972</p> <p><b>Glandular cells</b><br/>Staining: Medium<br/>Intensity: Strong<br/>Quantity: &lt;25%<br/>Location: Cytoplasmic/membranous</p>                                                                                                                                  |  | <p>Male, age 29<br/>Epididymis, spermatic cord, NOS (T-79000)<br/>Epididymis (T-79100)<br/>Peripheral nerve tissue (T-X0500)<br/>Normal tissue, NOS (M-00100)<br/>Patient id: 4845</p> <p><b>Glandular cells</b><br/>Staining: Medium<br/>Intensity: Strong<br/>Quantity: &lt;25%<br/>Location: Cytoplasmic/membranous</p>                                                                             |  | <p>Male, age 31<br/>Epididymis, spermatic cord, NOS (T-79000)<br/>Epididymis (T-79100)<br/>Normal tissue, NOS (M-00100)<br/>Patient id: 4796</p> <p><b>Glandular cells</b><br/>Staining: Medium<br/>Intensity: Strong<br/>Quantity: &lt;25%<br/>Location: Cytoplasmic/membranous</p>                                                                                 |

Seminal vesicle

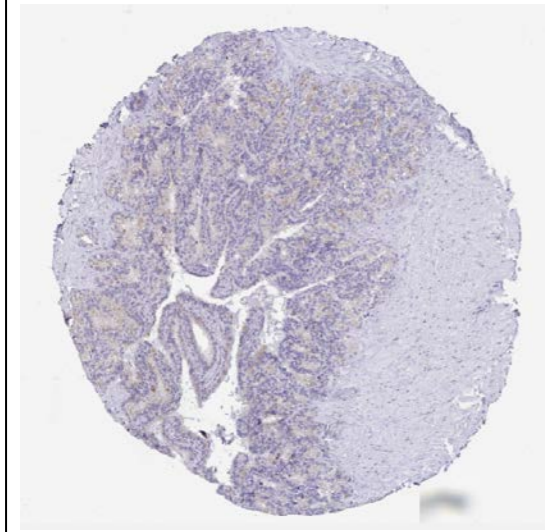

Male, age 60  
 Seminal veicle (T-77500)  
 Normal tissue, NOS (M-00100)  
 Patient id: 4343

**Glandular cells**  
 Staining: Low  
 Intensity: Weak  
 Quantity: 75%-25%  
 Location: Cytoplasmic/membranous

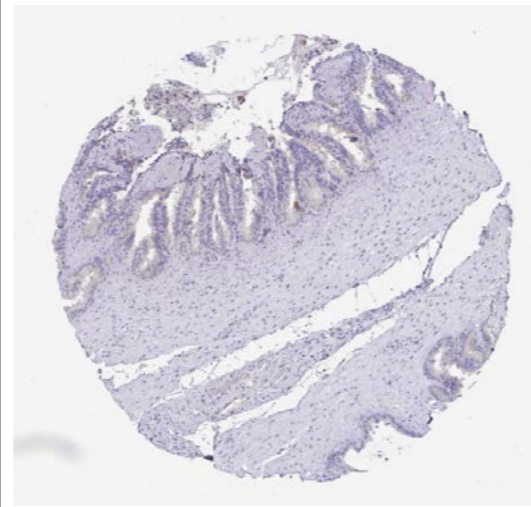

Male, age 60  
 Seminal veicle (T-77500)  
 Normal tissue, NOS (M-00100)  
 Patient id: 4528

**Glandular cells**  
 Staining: Low  
 Intensity: Weak  
 Quantity: 75%-25%  
 Location: Cytoplasmic/membranous

Appendix

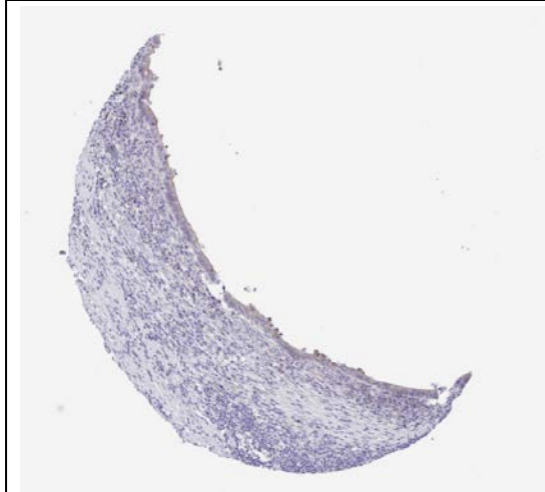

Female, age 56  
 Appendix (T-66000)  
 Normal tissue, NOS (M-00100)  
 Patient id: 4548

**Glandular cells**  
 Staining: Low  
 Intensity: Weak  
 Quantity: >75%  
 Location: Cytoplasmic/membranous

**Lymphoid tissue**  
 Staining: Not detected  
 Intensity: Negative  
 Quantity: None

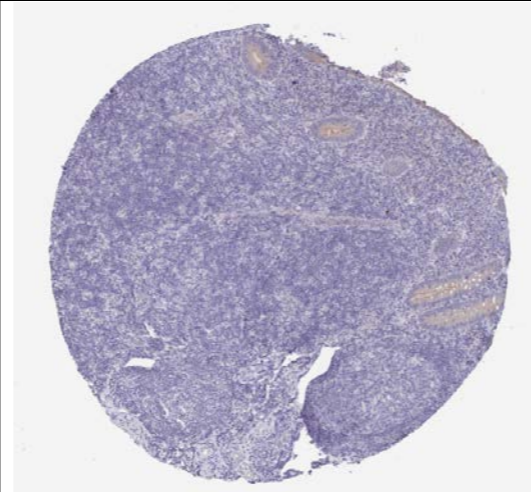

Male, age 18  
 Appendix (T-66000)  
 Normal tissue, NOS (M-00100)  
 Patient id: 4394

**Glandular cells**  
 Staining: Low  
 Intensity: Weak  
 Quantity: >75%  
 Location: Cytoplasmic/membranous

**Lymphoid tissue**  
 Staining: Not detected  
 Intensity: Negative  
 Quantity: None

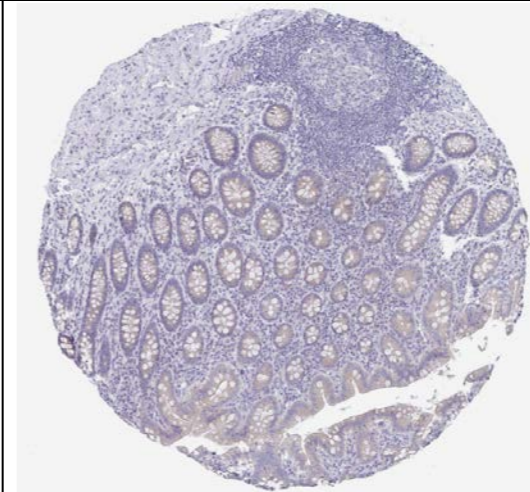

Male, age 71  
 Appendix (T-66000)  
 Normal tissue, NOS (M-00100)  
 Patient id: 1898

**Glandular cells**  
 Staining: Low  
 Intensity: Weak  
 Quantity: >75%  
 Location: Cytoplasmic/membranous

**Lymphoid tissue**  
 Staining: Not detected  
 Intensity: Negative  
 Quantity: None

|  |                |  |                |  |                |
|--|----------------|--|----------------|--|----------------|
|  | Location: None |  | Location: None |  | Location: None |
|--|----------------|--|----------------|--|----------------|
